# Supplementary material for: Unravelling the chemical nature of copper cuprizone
Source: Royal Society of Chemistry journal article supplement (doi:10.1039/b701896g), 2007-01-01
Supplement: b701896g.pdf [file b701896g.pdf]

# *Unravelling The Chemical Nature Of Copper Cuprizone*

*Luigi Messori<sup>a,\*</sup>, Angela Casini<sup>a</sup>, Chiara Gabbiani<sup>a</sup>, Lorenzo Sorace<sup>a</sup>,  
Maurizio Muniz-Miranda<sup>a</sup> and Paolo Zatta.<sup>b</sup>*

Supplementary Material

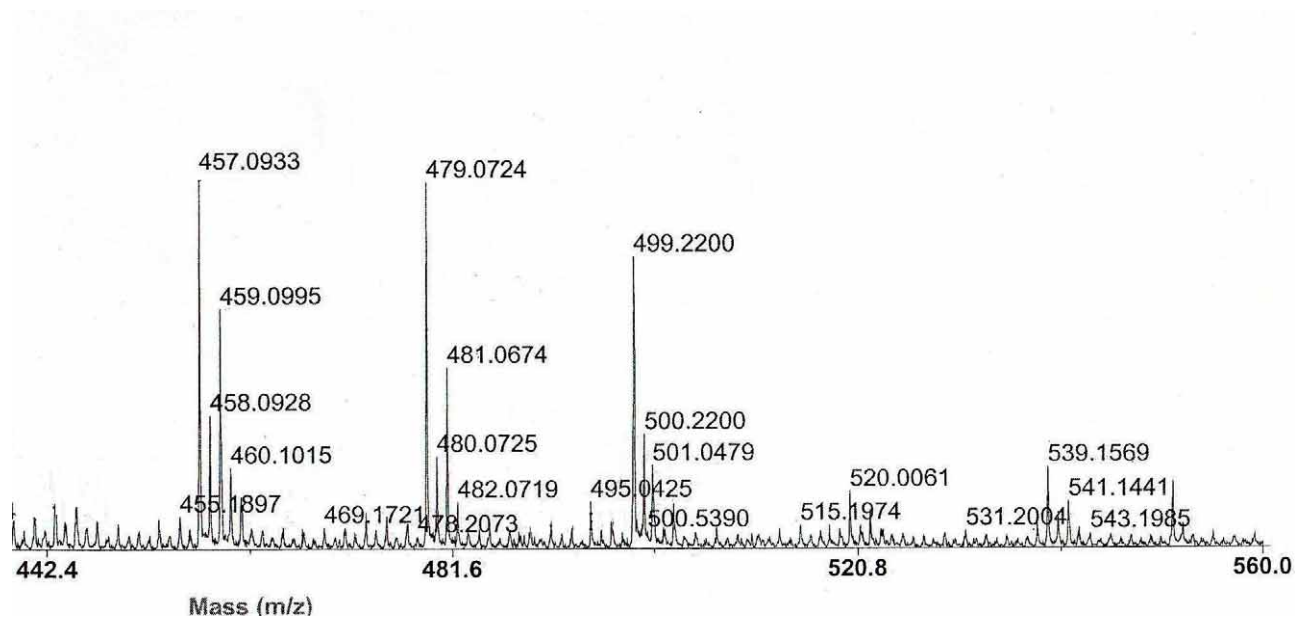

**Figure S1** Detail of the ESI MS spectra of the complex recorded in the positive ion mode.

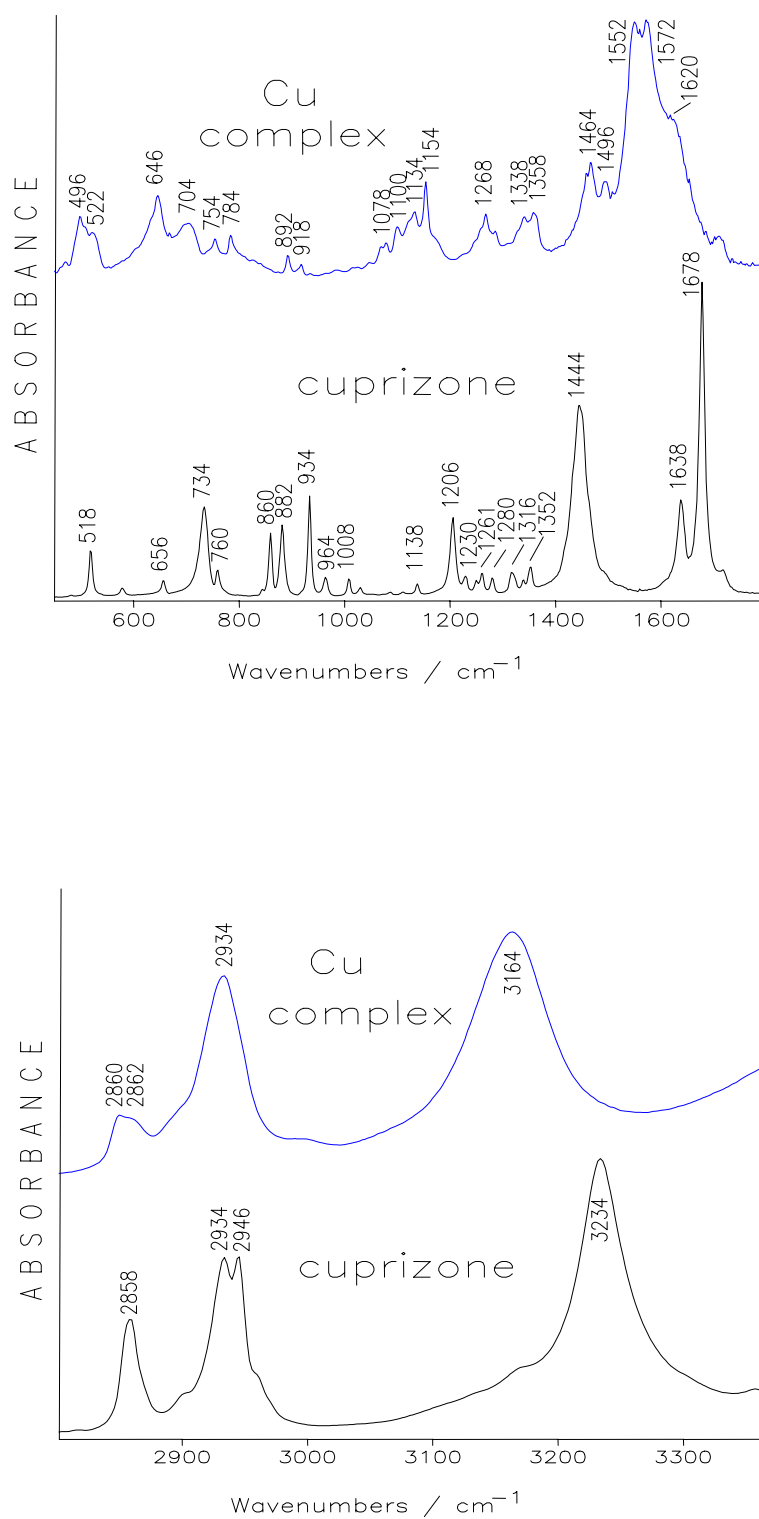

Figure S2 IR spectra of cuprizone and of the Cu/CPZ complex

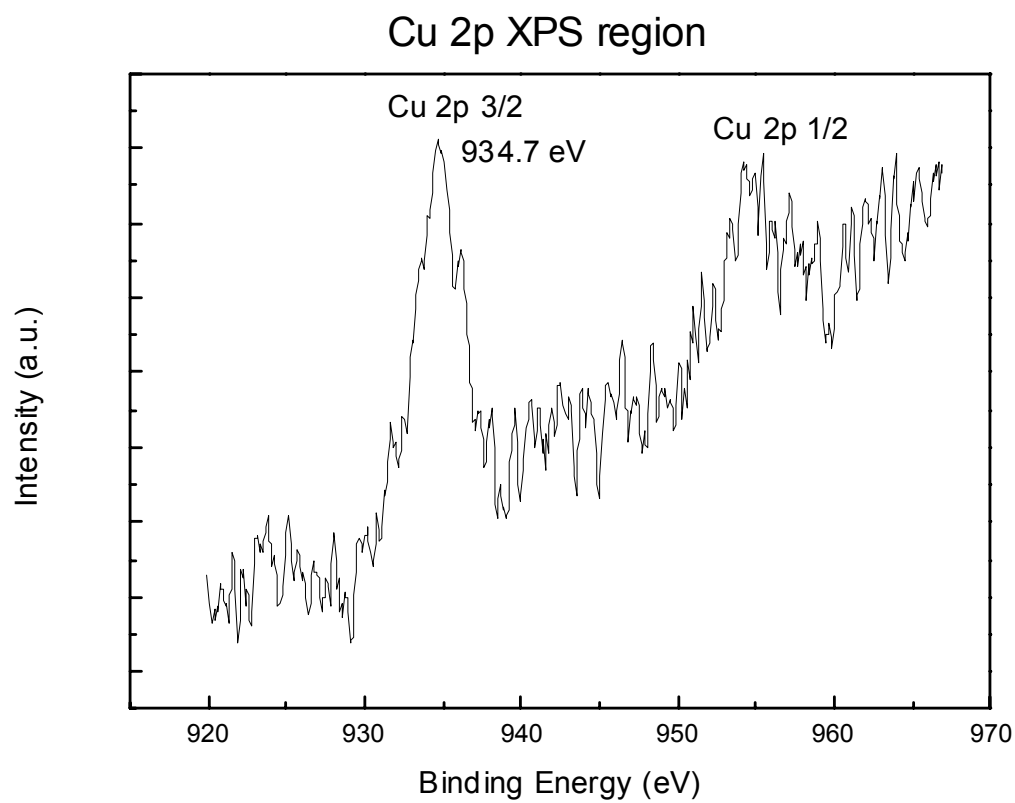

**Figure S3** XPS spectrum of the Copper-CPZ complex. Copper 2p region.
